# Supplementary material for: Natural Occurrence of Mycotoxin-Producing Fusaria in Market-Bought Peruvian Cereals: A Food Safety Threat for Andean Populations
Source: PubMed Central journal article supplement (PMC7926892; doi:10.3390/toxins13020172), 2021-02-23
Supplement: toxins-13-00172-s001.pdf [file toxins-13-00172-s001.pdf]

# Natural Occurrence of Mycotoxin-Producing *Fusaria* in Market-Bought Peruvian Crops: a Food Safety Threat for Andean Populations

Christine Ducos, Laetitia Pinson-Gadais, Sylvain Chereau, Florence Richard-Forget, Pedro Vásquez-Ocmín, Juan Pablo Cerapio, Sandro Casavilca-Zambrano, Eloy Ruiz, Pascal Pineau, Stéphane Bertani and Nadia Ponts

## 1. Supplementary Methods: Tri5-TCTA and Tri5-TCTB primer design

Multiple sequence alignment was performed using nucleotide sequences of *Tri5* gene extracted from *Fusarium* species that can produce either type A trichothecens (TCTA) or type B trichothecens (TCTB). Species and accession numbers are provided in Supplementary Table S1. Primers for Sybr Green-based qPCR assay were subsequently designed in discerning regions using Primer3 [1,2].

**Table S1.** *Fusarium* species and NCBI sequence accession numbers used to design TCTA and TCTB-discerning primers.

| Toxins Produced               | Species and Strain                    | NCBI Accession Number of <i>Tri5</i> Sequence |
|-------------------------------|---------------------------------------|-----------------------------------------------|
| TCTA                          | <i>F. camptoceras</i> NRRL3381        | GQ915545.1                                    |
|                               | <i>F. sporotrichioides</i>            | AY130293.1                                    |
|                               | <i>F. langsethiae</i> IBT 9956        | AF449792.1                                    |
|                               | <i>F. kyushuense</i> NRRL 25349       | GQ915548.1                                    |
|                               | <i>F. incarnatum</i> NRRL 31160       | GQ915550.1                                    |
|                               | <i>F. armeniacum</i> FRC R-0933       | GQ915543.1                                    |
|                               | <i>G. publicaris</i> FRC_R 07843      | GQ915552.1                                    |
| TCTB                          | <i>F. graminearum</i> NRRL9394        | AY102605.1                                    |
|                               | <i>F. austroamericanum</i> NRRL 2903  | AY102596.1                                    |
|                               | <i>F. asiaticum</i> NRRL 28720        | AY102590.1                                    |
|                               | <i>F. graminearum</i> GZ3639          | AF359361.3                                    |
|                               | <i>F. graminearum</i> PH-1            | supercont3.2 -3376420-3377787 <sup>1</sup>    |
|                               | <i>F. cortaderiae</i> NRRL 29306      | AY102601.1                                    |
|                               | <i>F. culmorum</i> NRRL 25475         | AY102571.1                                    |
|                               | <i>F. acaciae-mearnsii</i> NRRL 26754 | AY102577.1                                    |
| <i>F. cerealis</i> NRRL 25491 | AY102572.1                            |                                               |

<sup>1</sup> Sequence source from [3].

## 2. Supplementary Figures

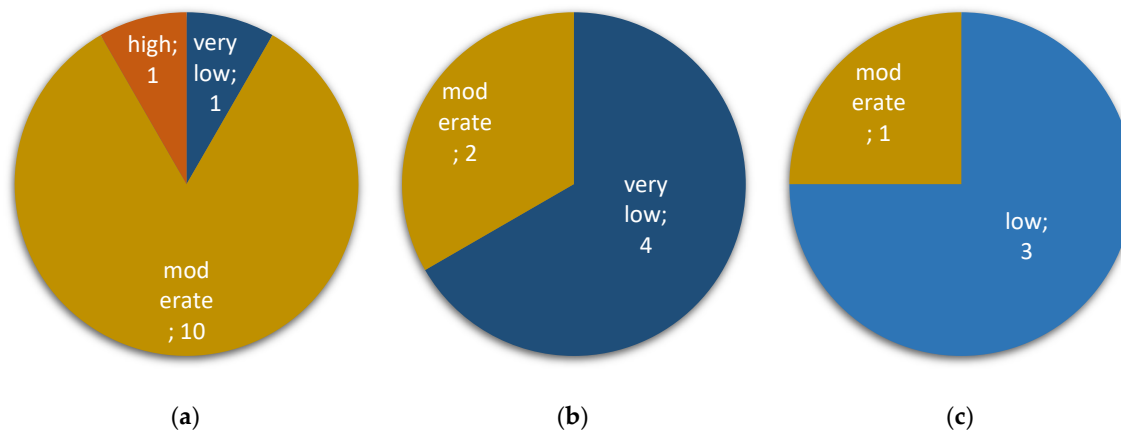

**Figure S1.** *Fusarium* risk assessment in collected amaranth, barley and oat grain samples. Risk is ranked as *very low*, *low*, *moderate*, *high*, or *very high*. Number after semicolon indicates corresponding sample size. (a) amaranth seeds; (b) barley; (c) oat.

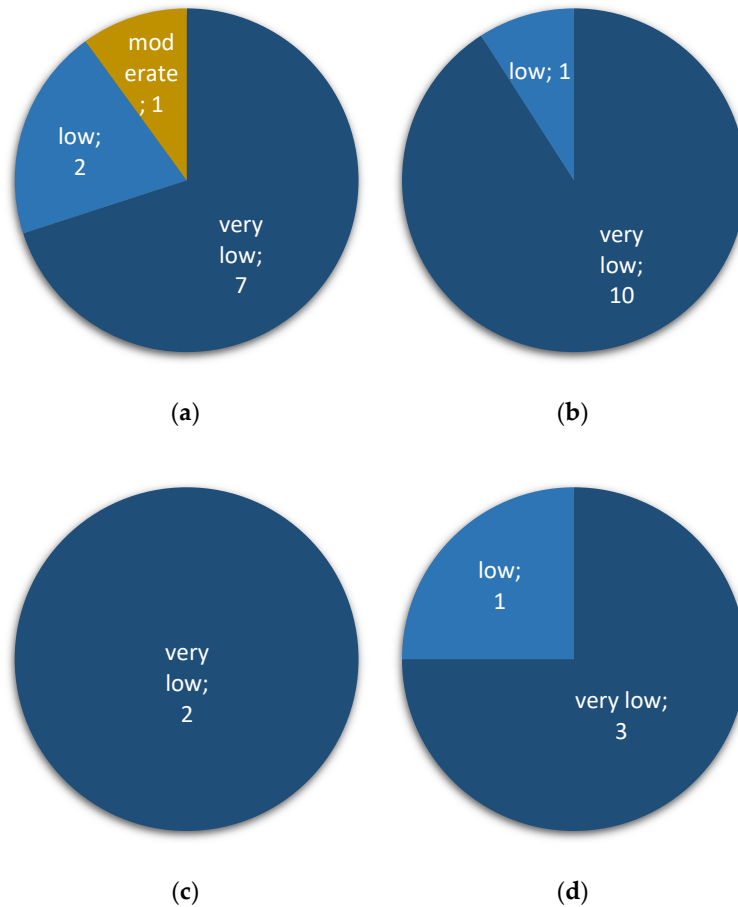

**Figure S2.** Assessment of the risk associated with the presence of fumonisin producers in cereal and pseudo-cereal grains contaminated with *Fusarium* species. Risk is ranked as *very low*, *low*, *moderate*, *high*, or *very high*. Number after semicolon indicates corresponding sample size. (a) rice; (b) amaranth seeds; (c) barley; (d) oat.

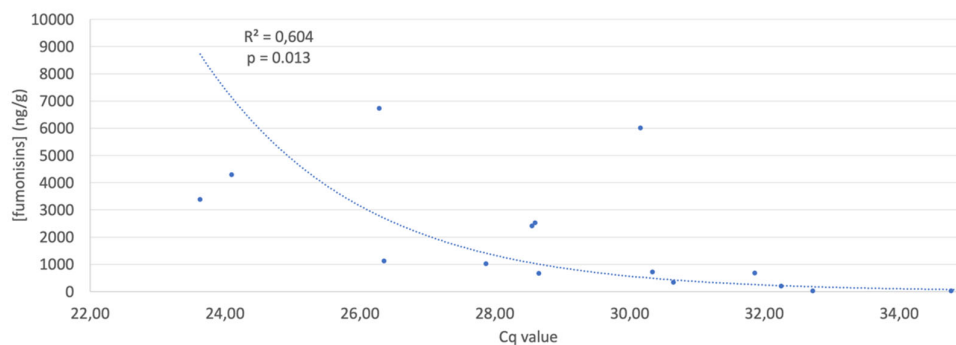

**Figure S3.** Fumonisin content as a function of the relative abundance of *Fum1*-containing DNA measured by qPCR in cereal samples. Pearson product-moment correlation coefficient ( $R^2$ ) and associated  $p$ -value were computed with Matlab 2020b (MathWorks) and used to estimate the goodness of fit of the monotonic non-linear relationship.

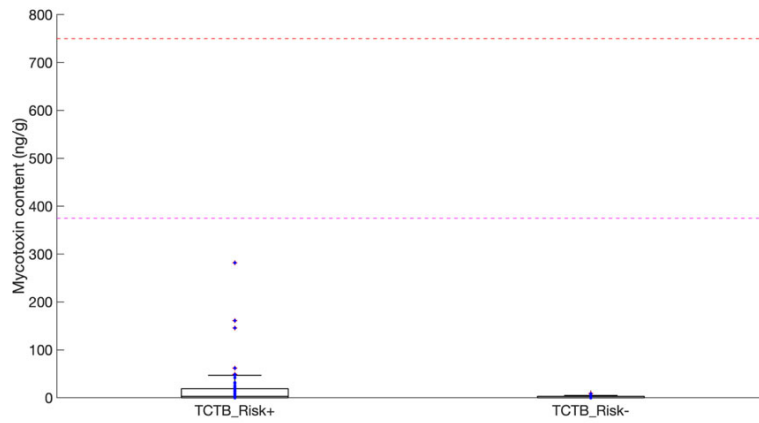

(a)

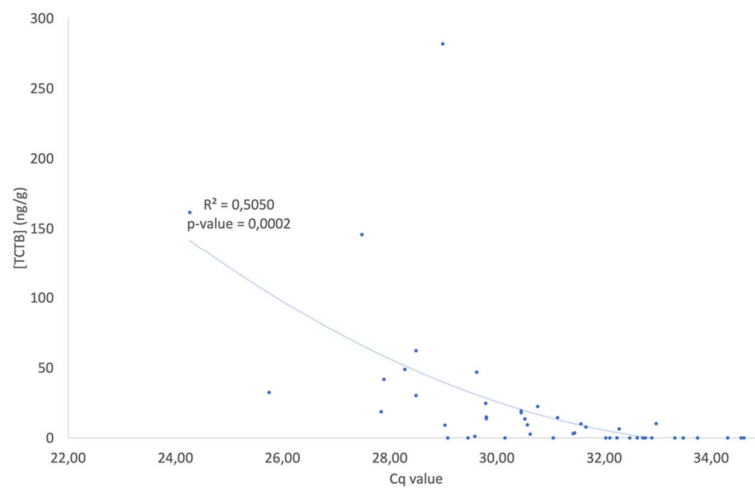

(b)

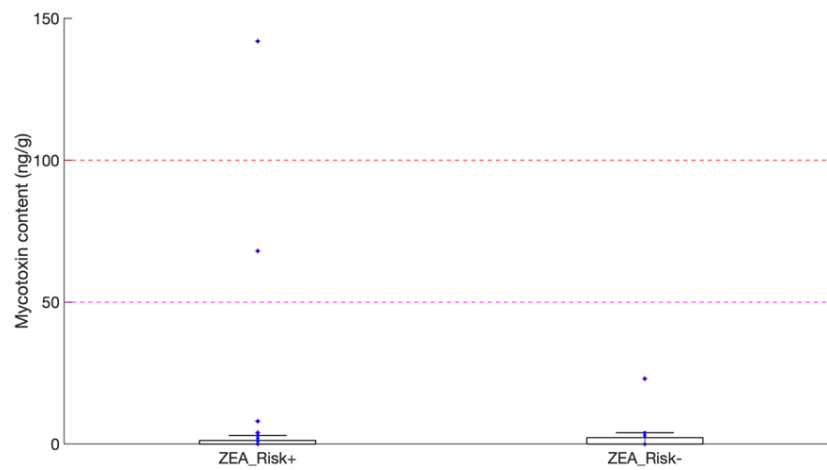

(c)

**Figure S4.** Toxin contamination profiles in cereal and pseudo-cereal grains contaminated with *Fusarium* species that can produce TCTB and zearalenone. (a) Boxplot representation of TCTB contents. “TCTB-Risk+” refers to samples with moderate to very high TCTB-associated risk, and “TCTB-Risk-” refers to 10 randomly selected samples with risk ranked as very low to low. The pink and red dashed lines indicates the 375 and 750 ng.g<sup>-1</sup> thresholds, respectively; (b) TCTB content as a function of the relative abundance of *Tri5*-containing DNA measured by qPCR in cereal samples. Pearson product-moment correlation coefficient ( $R^2$ ) and associated  $p$ -value were computed with Matlab 2020b (MathWorks) and used to estimate the goodness of fit of the monotonic non-linear relationship; (c) Boxplot representation of zearalenone contents. “ZEA-Risk+” refers to samples with moderate to very high ZEA-associated risk, and “ZEA-Risk-” refers to samples with risk ranked as very low to low. The pink and red dashed lines indicates the 50 and 100 ng.g<sup>-1</sup> thresholds, respectively.

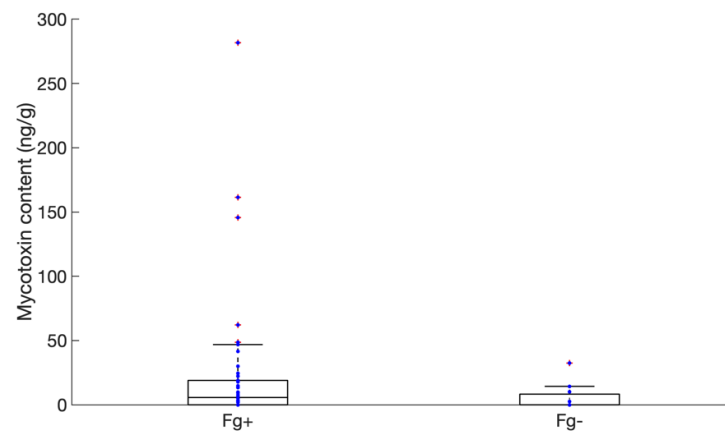

**Figure S5.** Boxplot representation of TCTB contents of *Tri5*-positive samples that tested positive for *F. graminearum* (“Fg+”) or negative (“Fg-”).

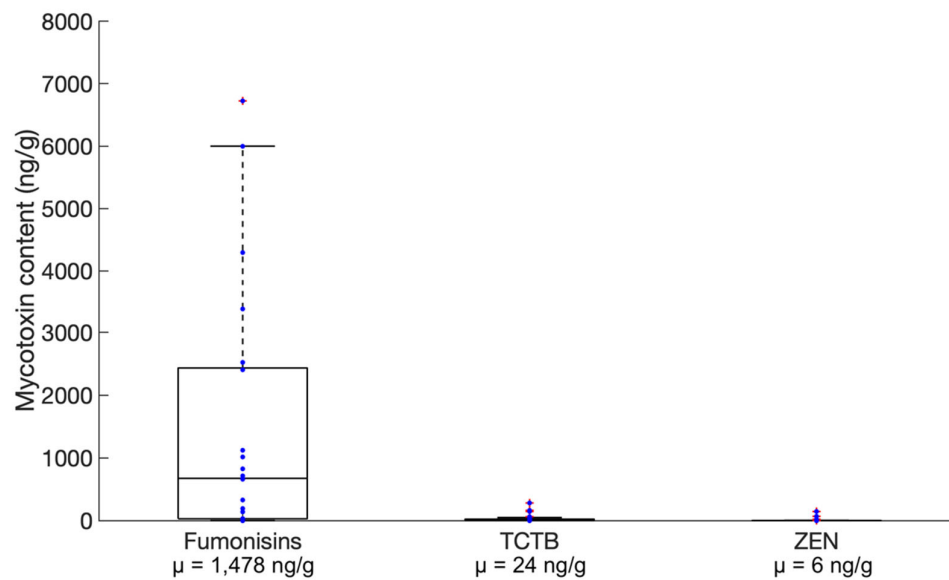

(a)

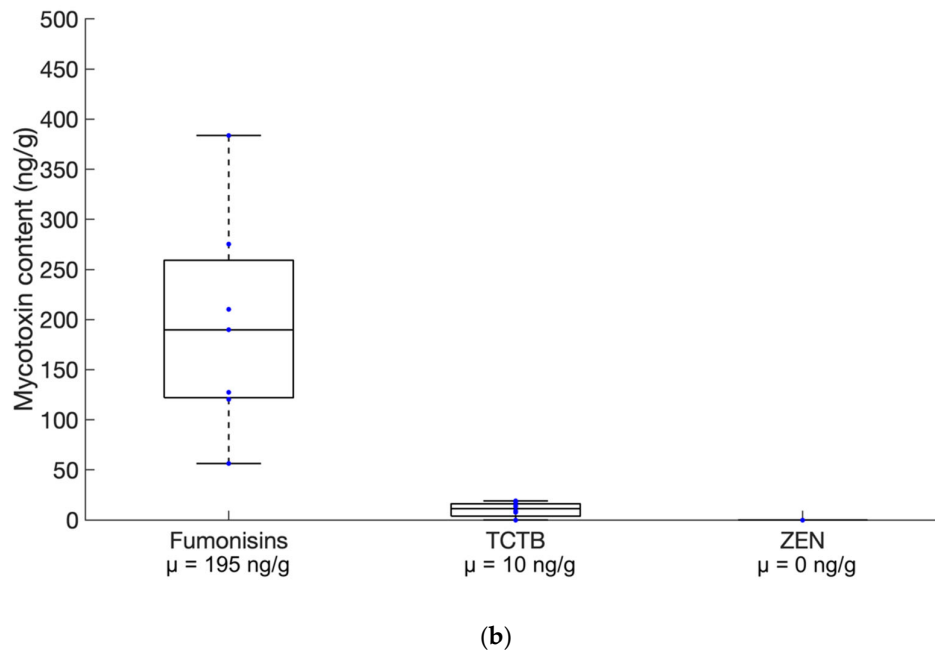

**Figure S6.** Boxplot representation of mycotoxin content in corn and wheat measured in samples with *moderate to very high* mycotoxin-associated risk. The values  $\mu$  indicate mean values for the corresponding toxins.  $\mu = 0$  means no mycotoxin could be detected. (a) Corn. (b) Wheat. Boxplots and means were not computed for other cereals for which only three samples or less were at *moderate to very high* mycotoxin-associated risk and showing very low or no detectable levels of mycotoxins.

### 3. Additional references

1. Untergasser, A.; Cutcutache, I.; Koressaar, T.; Ye, J.; Faircloth, B.C.; Remm, M.; Rozen, S.G. Primer3—New Capabilities and Interfaces. *Nucleic Acids Res* **2012**, *40*, e115, doi:10.1093/nar/gks596.
2. Koressaar, T.; Remm, M. Enhancements and Modifications of Primer Design Program Primer3. *Bioinformatics* **2007**, *23*, 1289–1291, doi:10.1093/bioinformatics/btm091.
3. Wong, P.; Walter, M.; Lee, W.; Mannhaupt, G.; Münsterkötter, M.; Mewes, H.-W.; Adam, G.; Güldener, U. FGDB: Revisiting the Genome Annotation of the Plant Pathogen *Fusarium Graminearum*. *Nucleic Acids Res* **2011**, *39*, D637–639, doi:10.1093/nar/gkq1016.
